# Supplementary material
Source: PubMed Central journal article supplement (PMC6045779)
Supplement: mmc1.pdf [file mmc1.pdf]

# A Longitudinal Cohort Study of Aspirin Use and Progression of Emphysema-like Lung Characteristics on CT Imaging

## The MESA Lung Study

*Carrie P. Aaron, MD; Joseph E. Schwartz, PhD; Eric A. Hoffman, PhD; Elsa Angelini, PhD; John H. M. Austin, MD; Mary Cushman, MD; David R. Jacobs Jr, PhD; Joel D. Kaufman, MD; Andrew Laine, DSc; Lewis J. Smith, MD; Jie Yang, MS; Karol E. Watson, MD, PhD; Russell P. Tracy, PhD; and R. Graham Barr, MD, DrPH*

CHEST 2018; 154(1):41-50

*Online supplements are not copyedited prior to posting and the author(s) take full responsibility for the accuracy of all data.*

**e-Figure 1. Description of the study sample**

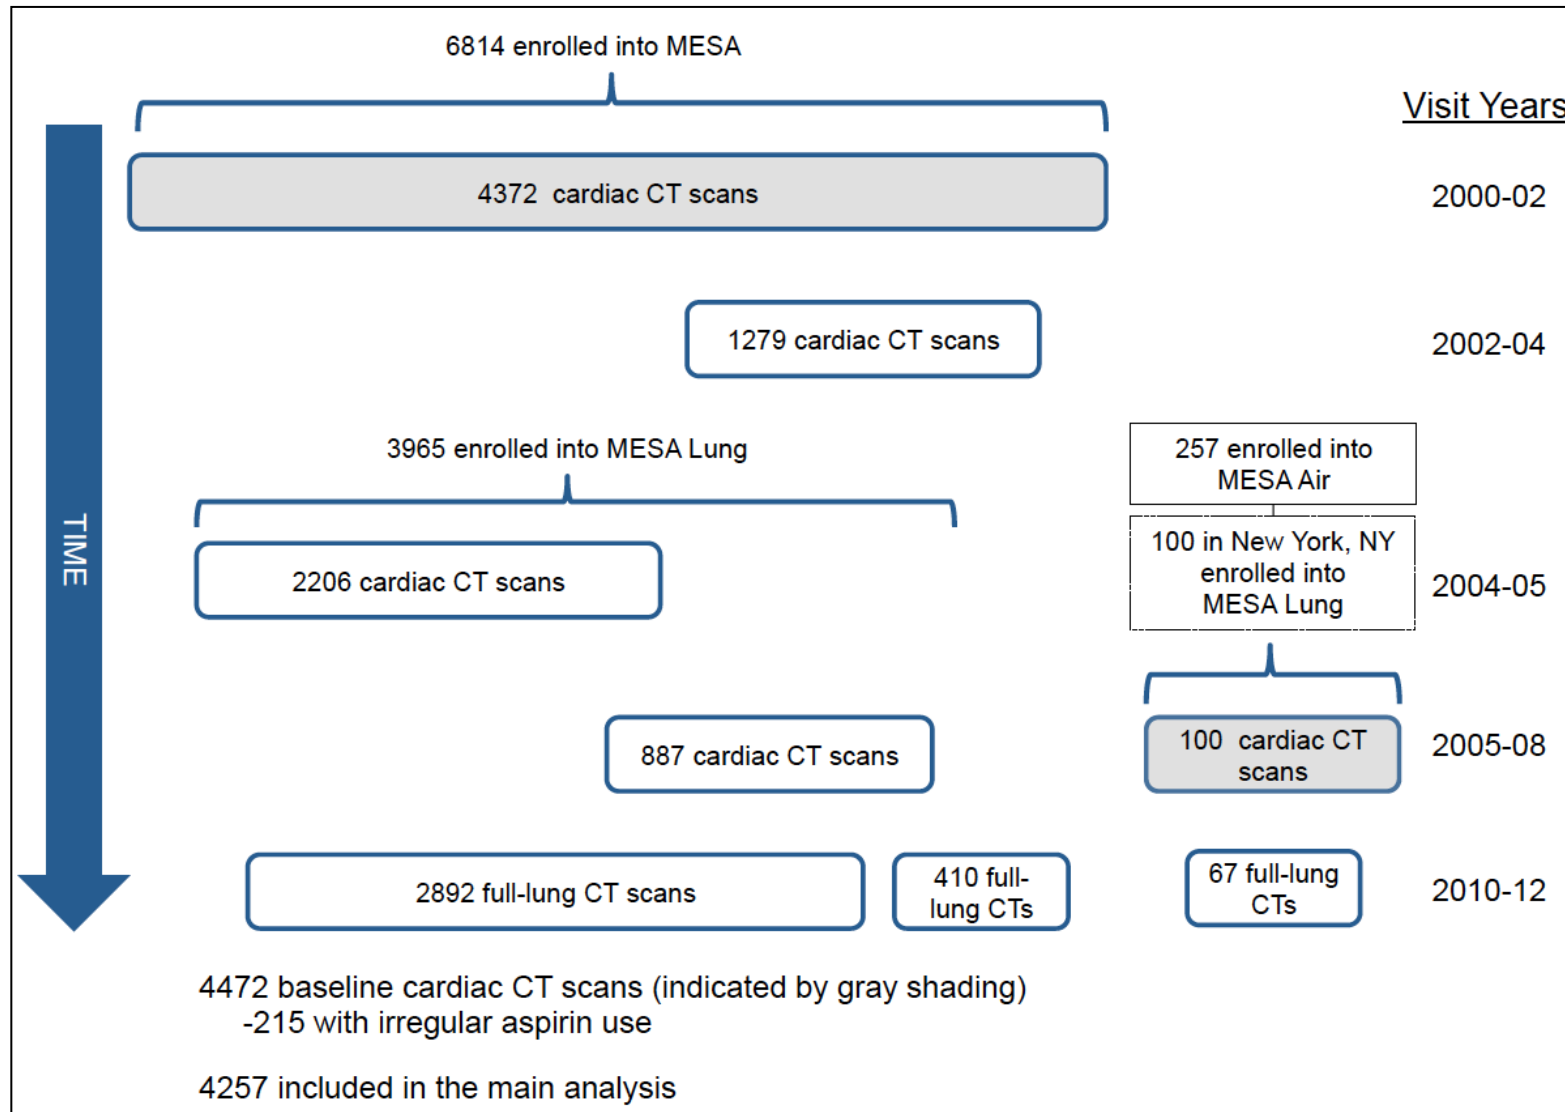

# CHEST<sup>®</sup> Online Supplement

**e-Figure 2. Monthly median attenuation (Hounsfield units) of air outside the body by site and scanner over time**

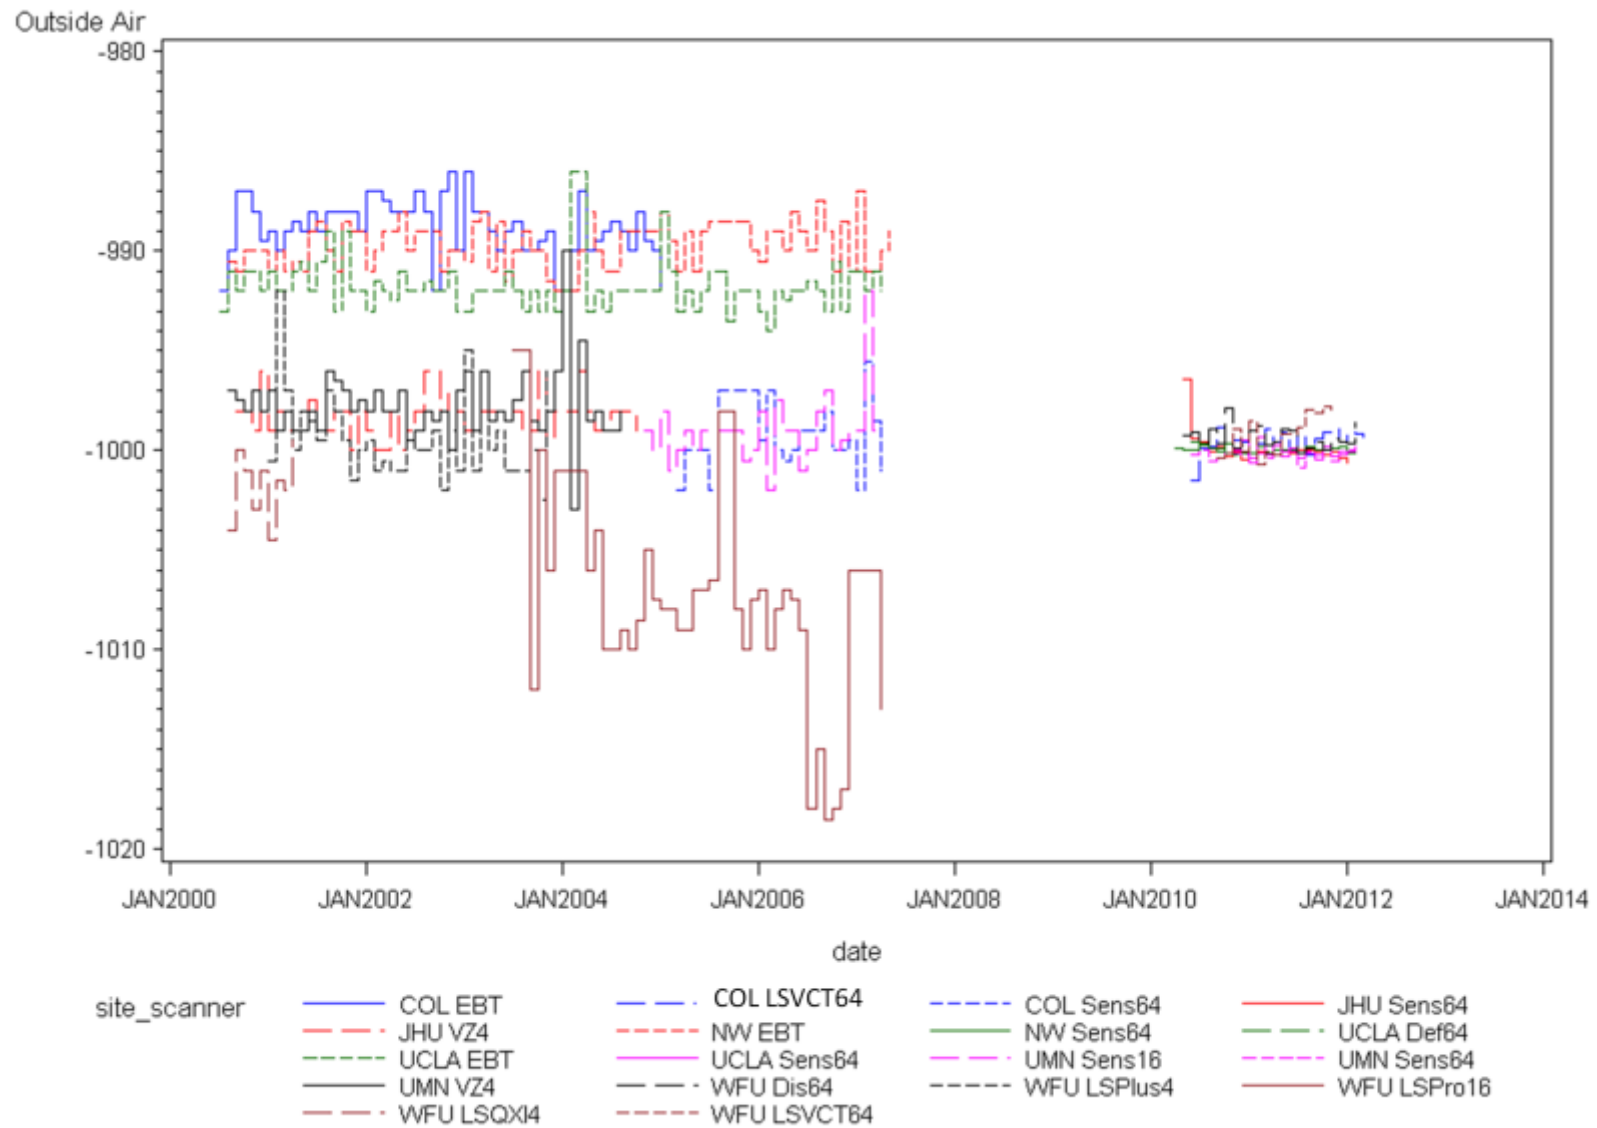

# CHEST<sup>®</sup> Online Supplement

Monthly median attenuation (Hounsfield units) of air outside the body assessed on each scan over 10 years of follow-up. The median value for each month is plotted against time. Multi-detector scanners have an average attenuation of air of -1,000 HU whereas electron beam scanners maintain a stable difference with an average attenuation of -990 HU. The outlier values between 2003 to 2007 were acquired on a GE LightSpeed Pro 16 scanner (solid brown line departing from average). Exclusion of scans acquired on these scanners increased the precision of results. The monthly median attenuation of outside air on full-lung scans acquired in 2010-12 were very stable; these were all acquired on 64-slice MDCT scanners. Labels above include the site followed by scanner type.

Site: COL=Columbia, JHU=Johns Hopkins University, NW=Northwestern, UCLA=University of California Los Angeles, UMN=University of Minnesota, WFU=Wake Forest University  
Scanner type: EBT=Electron beam tomography, LSVCT64=LightSpeed VCT 64 (GE), Sens64=Sensation 64 (Siemens), VZ4=Volume zoom 4 (Siemens), Def64=Definition 64 (Siemens), Sens16=Sensation 16 (Siemens), Dis64=Discovery 64 (GE), LSPlus4=LightSpeed Plus 4 (GE), LSPro16=LightSpeed Pro 16 (GE), LSQXI4=LightSpeed QX/i 4 (GE).

*We gratefully acknowledge Jamie Madrigano, ScD, MPH (School of Public Health, Rutgers, the State University of New Jersey at the time of this work, and now at RAND Corporation) for her contribution in creating this Figure.*

**e-Table 1. Selected baseline characteristics of participants included and not included in the analysis**

|                                                  | Included<br>in analysis<br>(N=4257) | Not included<br>in analysis<br>(N=2814) |
|--------------------------------------------------|-------------------------------------|-----------------------------------------|
| Age, years                                       | 61.3 ± 9.9                          | 63.5 ± 10.5                             |
| Male                                             | 48.7                                | 44.7                                    |
| Race                                             |                                     |                                         |
| White, non-Hispanic                              | 36.8                                | 43.2                                    |
| African-American                                 | 27.3                                | 27.4                                    |
| Hispanic                                         | 20.9                                | 23.3                                    |
| Chinese-American                                 | 14.9                                | 6.0                                     |
| Education                                        |                                     |                                         |
| Incomplete high school                           | 15.9                                | 20.7                                    |
| Completed high school                            | 18.2                                | 17.6                                    |
| Some college                                     | 28.0                                | 29.9                                    |
| Completed college                                | 18.7                                | 15.0                                    |
| Graduate degree                                  | 19.1                                | 16.1                                    |
| Height, cm                                       | 166.7 ± 10.0                        | 165.9 ± 10.0                            |
| Weight, kg                                       | 78.5 ± 17.1                         | 79.6 ± 17.8                             |
| BMI, kg/m <sup>2</sup>                           | 28.1 ± 5.3                          | 28.8 ± 5.8                              |
| Smoking status                                   |                                     |                                         |
| Never                                            | 46.5                                | 39.5                                    |
| Former                                           | 39.7                                | 42.3                                    |
| Current                                          | 13.8                                | 14.0                                    |
| Pack-years <sup>a</sup>                          | 25.0 ± 24.9                         | 24.4 ± 24.9                             |
| Cigarettes per day <sup>b</sup>                  | 12.5 ± 9.6                          | 13.9 ± 10.5                             |
| Hypertension                                     | 42.6                                | 47.9                                    |
| Systolic blood pressure, mmHg                    | 124.7 ± 20.1                        | 129.0 ± 23.1                            |
| Total cholesterol, mg/dL                         | 193.4 ± 35.2                        | 195.2 ± 36.9                            |
| Diabetes                                         | 11.2                                | 15.4                                    |
| Medication use                                   |                                     |                                         |
| Aspirin, 3 or more days per week                 | 21.8                                | 18.2                                    |
| ACE-inhibitor or ARB                             | 12.1                                | 13.4                                    |
| NSAID                                            | 16.0                                | 19.5                                    |
| COX-2 inhibitor                                  | 6.4                                 | 7.1                                     |
| ADP-receptor inhibitor                           | 0.3                                 | 0.2                                     |
| Statin                                           | 14.9                                | 15.7                                    |
| Diuretic                                         | 16.0                                | 18.5                                    |
| Framingham 10 year CHD risk <sup>c</sup> ≥ 10%   | 38.9                                | 44.1                                    |
| FEV <sub>1</sub> , mL <sup>d</sup>               | 2389 ± 731                          | 2384 ± 758                              |
| FEV <sub>1</sub> /FVC ratio <sup>e</sup>         | 0.75 ± 0.08                         | 0.73 ± 0.10                             |
| Airflow limitation on spirometry <sup>f</sup>    | 24.6                                | 27.5                                    |
| Asthma by self-report of physician diagnosis     | 9.5                                 | 10.4                                    |
| Percent emphysema- <sub>950</sub> , median (IQR) | 2.97 (1.23, 5.83)                   | 2.86 (1.23, 5.59)                       |
| Emphysema on CT <sup>g</sup>                     | 7.7                                 | 8.5                                     |
| C-reactive protein, mg/dL                        | 3.5 ± 5.3                           | 4.2 ± 6.5                               |
| Sphingomyelin, mg/dL                             | 47.8 ± 15.5                         | 48.3 ± 16.5                             |

Data are presented as mean  $\pm$  SD or %, except where noted.

Abbreviations: BMI=body mass index, ACE=angiotensin converting enzyme, ARB=angiotensin II receptor blocker, NSAID=non-steroidal anti-inflammatory drug (not including aspirin), ADP=adenosine diphosphate, CHD=coronary heart disease, FEV<sub>1</sub>=forced expiratory volume in 1 second, FVC=forced vital capacity, IQR=interquartile range

<sup>a</sup>among ever-smokers reporting pack-years (2016 included in analysis, 1438 not included in analysis)

<sup>b</sup>among current smokers reporting cigarettes per day (556 included in analysis, 382 not included in analysis)

<sup>c</sup>Framingham Risk Score as per Wilson PW et al, Circulation 1998

<sup>d</sup>among those with valid FEV<sub>1</sub> measured (3770 included in analysis, 119 not included in analysis)

<sup>e</sup>among those with valid FEV<sub>1</sub>/FVC measured (3697 included in analysis, 116 not included in analysis)

<sup>f</sup>airflow limitation defined as pre-bronchodilator FEV<sub>1</sub>/FVC <0.7, among those with FEV<sub>1</sub>/FVC without a restrictive ventilatory defect (3431 included in the analysis, 178 not included in the analysis)

<sup>g</sup>Emphysema on CT defined as above the upper limit of normal, among those reporting cigarettes per day and smoking status (4224 included in analysis, and 2794 not included in analysis)

**e-Table 2. Predicted change in lung density at the lower 15<sup>th</sup> percentile (PD15) over 10 years for participants taking aspirin regularly compared to those not taking aspirin**

|                                     | Change in PD15 over 10 years, in HU (95% CI) | P-value |
|-------------------------------------|----------------------------------------------|---------|
| <b>Unweighted</b>                   |                                              |         |
| Unadjusted                          | 2.89 (0.75, 5.04)                            | 0.008   |
| Model 1                             | 3.30 (1.22, 5.38)                            | 0.002   |
| Model 2                             | 3.26 (1.18, 5.34)                            | 0.002   |
| Model 3                             | 3.07 (0.98, 5.15)                            | 0.004   |
| <b>Weighted by propensity score</b> |                                              |         |
| Unadjusted                          | 2.53 (0.56, 4.50)                            | 0.012   |
| Model 1                             | 3.13 (1.22, 5.05)                            | 0.001   |
| Model 2                             | 3.11 (1.20, 5.02)                            | 0.001   |
| Model 3                             | 2.98 (1.06, 4.89)                            | 0.002   |

Model 1: adjusted for baseline age, sex, race/ethnicity, sex\*time and race/ethnicity\*time interactions, education, time-varying height, weight, CT scanner model, mAs and voxel size

Model 2: additionally adjusted for baseline pack-years, pack-years\*time interaction and time-varying cigarettes per day for current smokers

Model 3: additionally adjusted for baseline hypertension, C-reactive protein, sphingomyelin, ACE-inhibitor or ARB use and ACE-inhibitor or ARB use\*time interaction

**e-Table 3. Predicted change in lung function per year for participants taking aspirin regularly compared to those not taking aspirin regularly**

|                                             | Predicted change in lung function per year (95% CI) | P-value |
|---------------------------------------------|-----------------------------------------------------|---------|
| <b>FEV<sub>1</sub>, mL (n=3770)</b>         |                                                     |         |
| Unadjusted                                  | -1.87 (-5.43, 1.69)                                 | 0.30    |
| Model 1                                     | 0.01 (-3.48, 3.49)                                  | 0.99    |
| Model 2                                     | 0.20 (-3.33, 3.73)                                  | 0.91    |
| <b>FEV<sub>1</sub>/FVC ratio,% (n=3697)</b> |                                                     |         |
| Unadjusted                                  | -0.04 (-0.12, 0.03)                                 | 0.24    |
| Model 1                                     | -0.04 (-0.11, 0.04)                                 | 0.35    |
| Model 2                                     | -0.03 (-0.11, 0.04)                                 | 0.38    |

Model 1: adjusted for baseline age, sex, race/ethnicity, sex\*time and race/ethnicity\*time interaction, education, time-varying height and weight, as well as height<sup>2</sup> for FEV<sub>1</sub>

Model 2: additionally adjusted for baseline pack-years, C-reactive protein and time-varying smoking status
